# Supplementary material for: Systems-level network modeling of Small Cell Lung Cancer subtypes identifies master regulators and destabilizers
Source: PubMed Central journal article supplement (PMC6860456; doi:10.1371/journal.pcbi.1007343), 2019-10-31

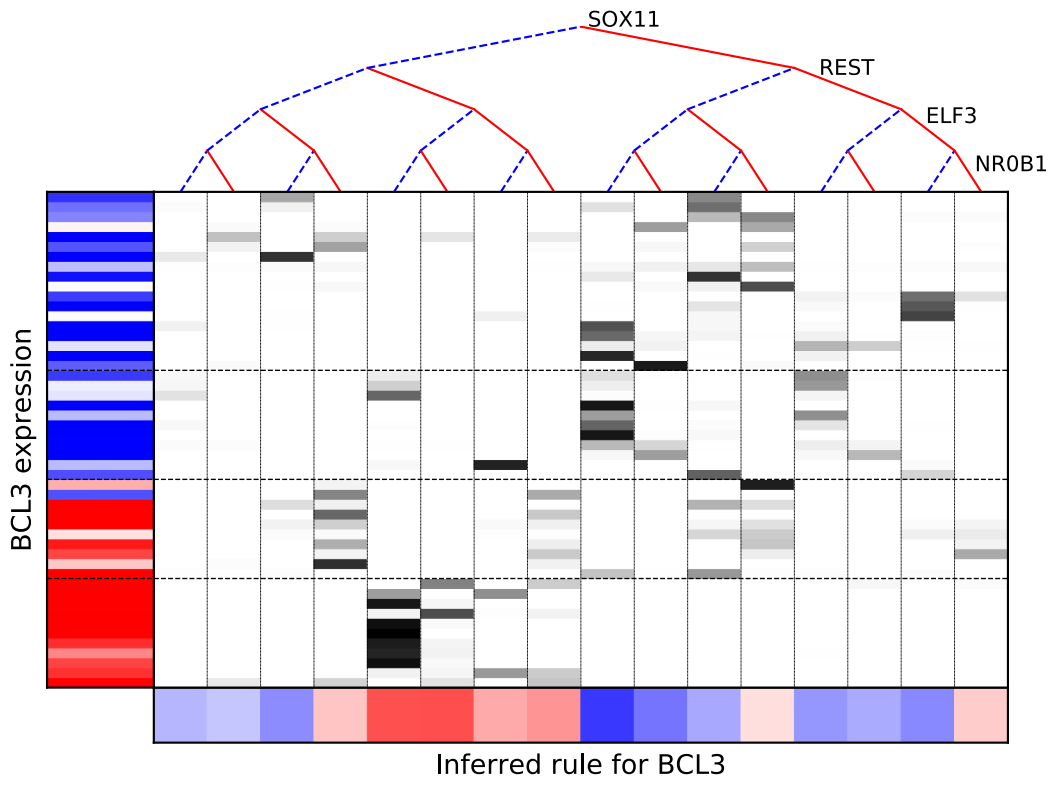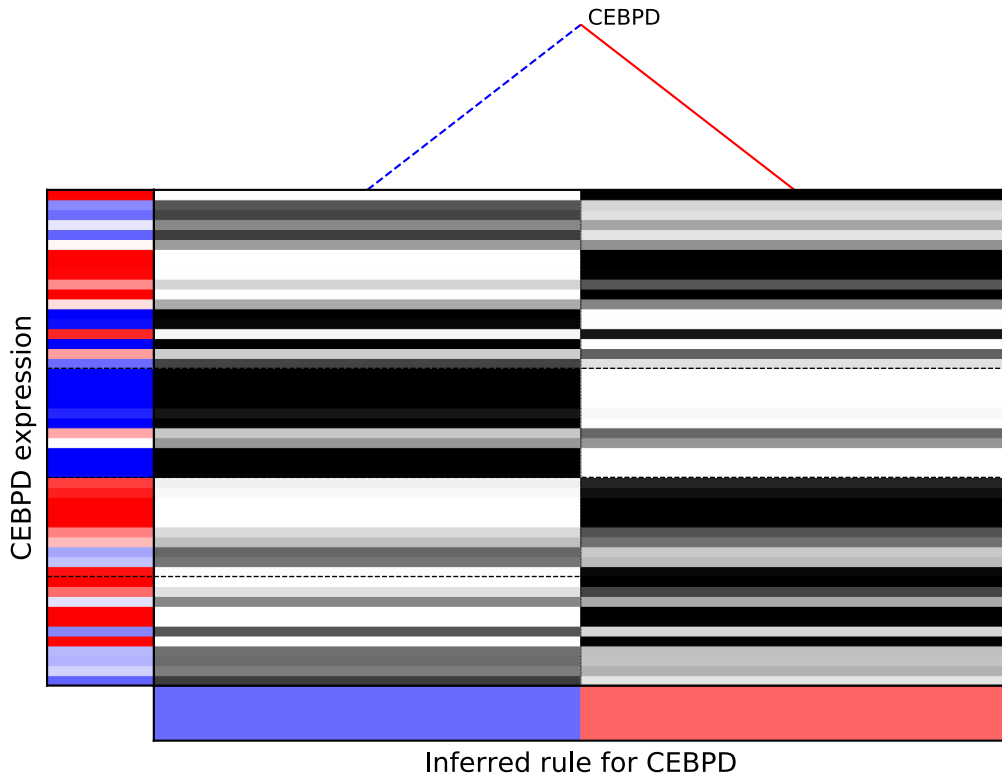

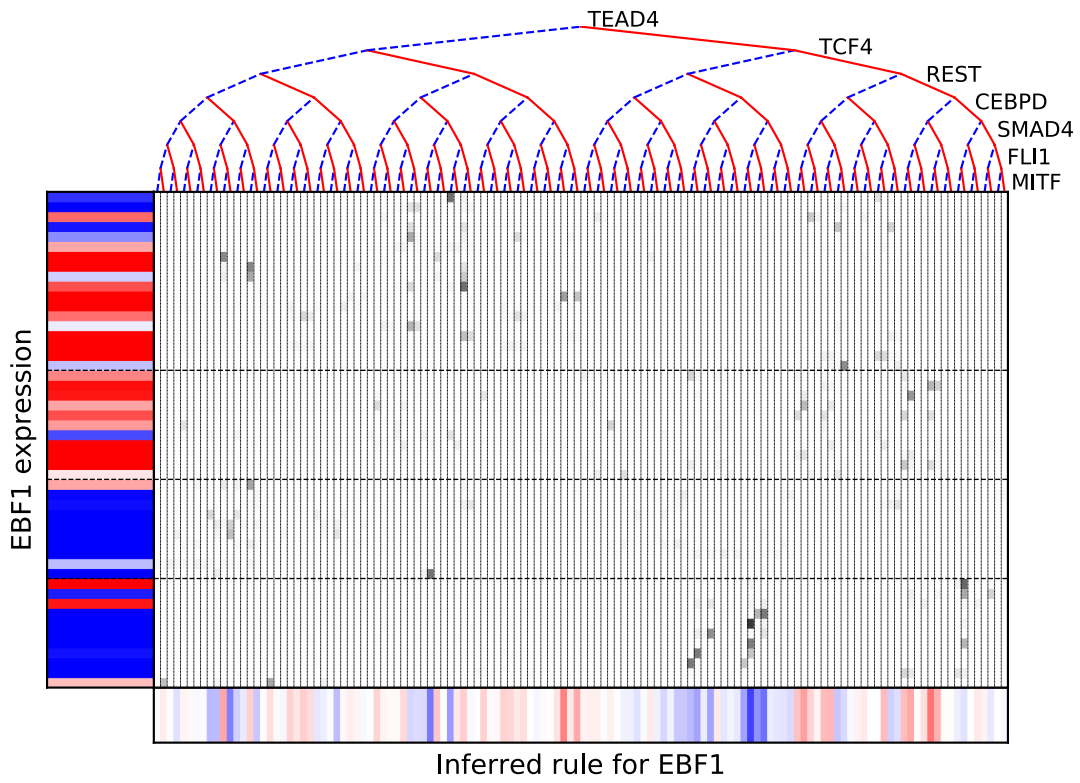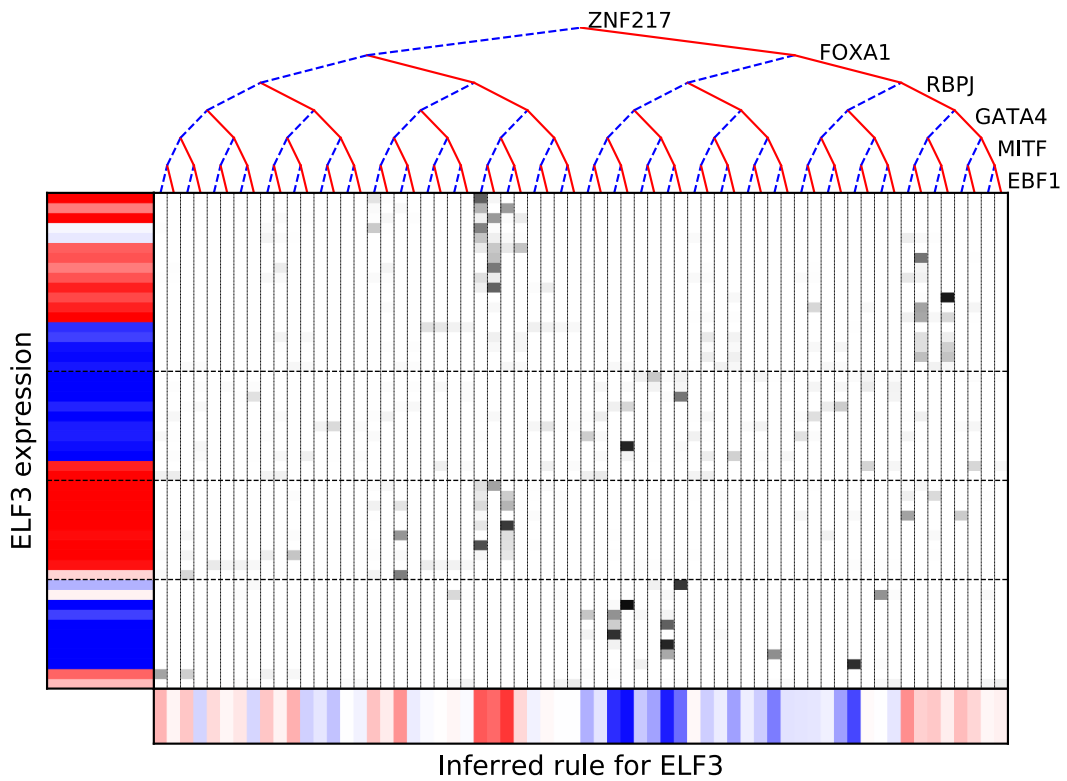

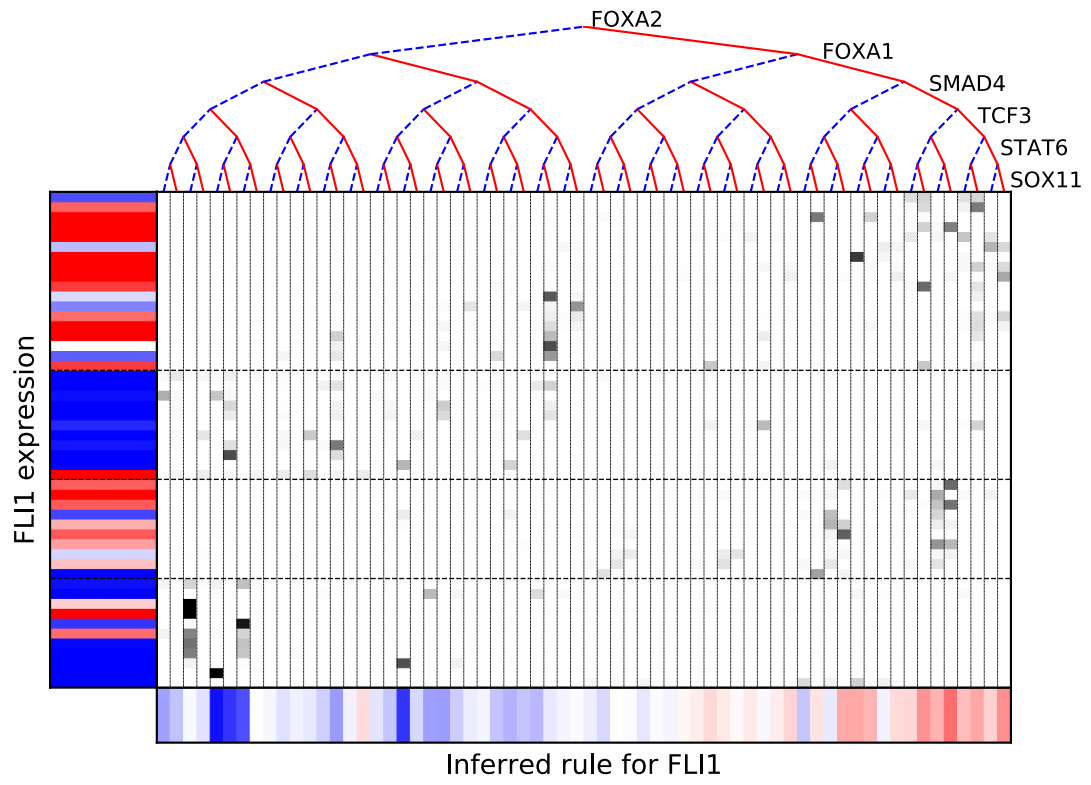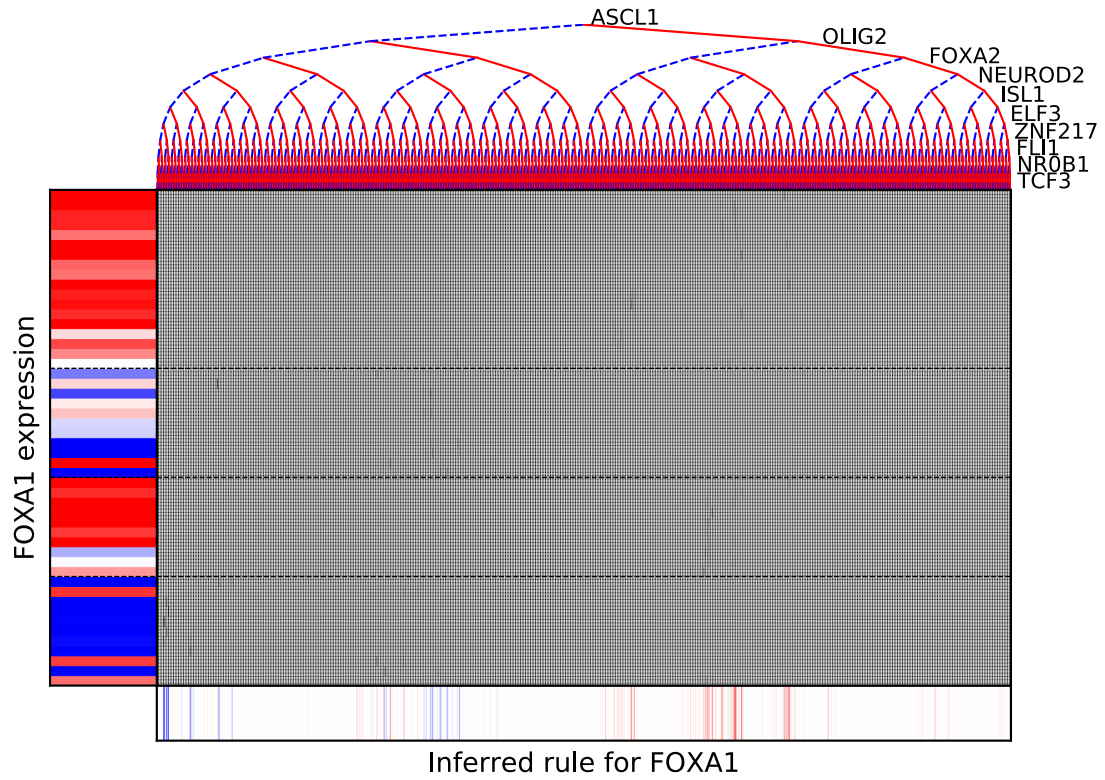

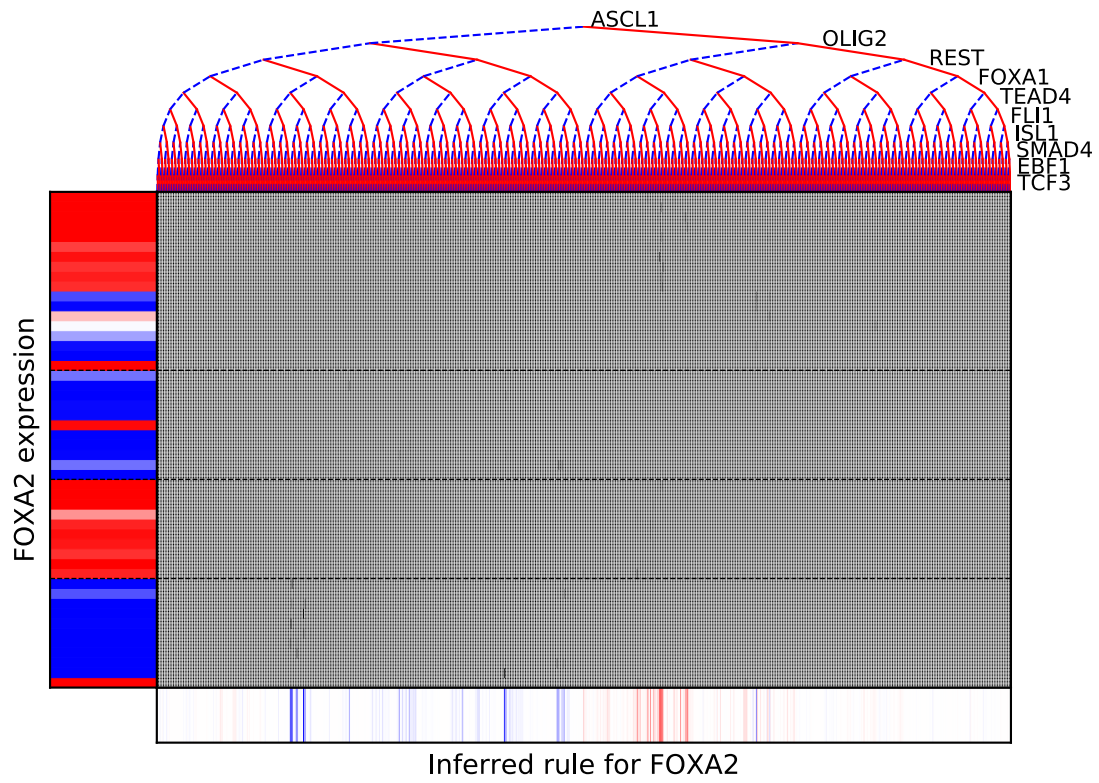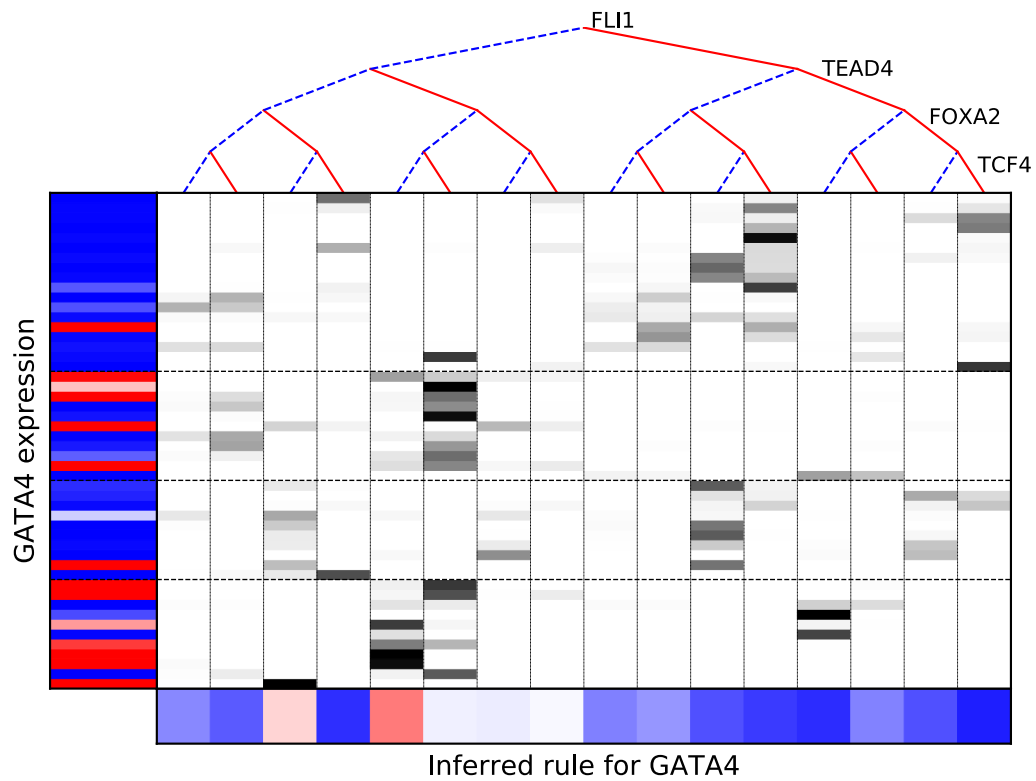

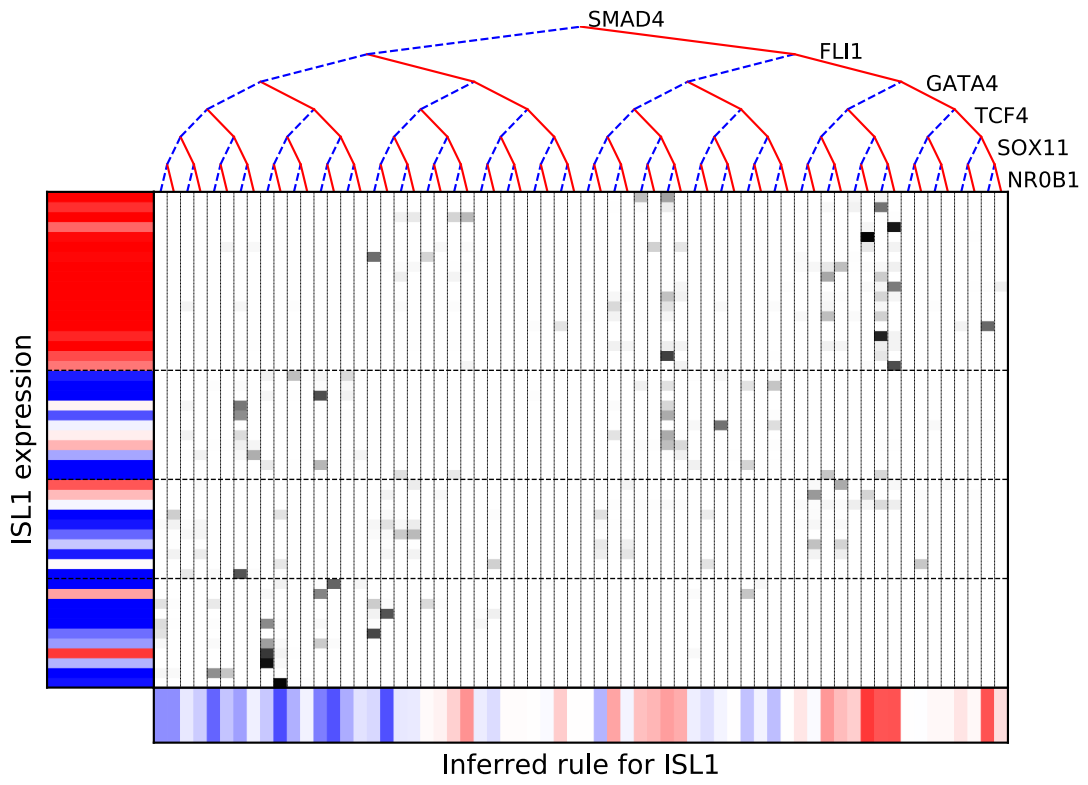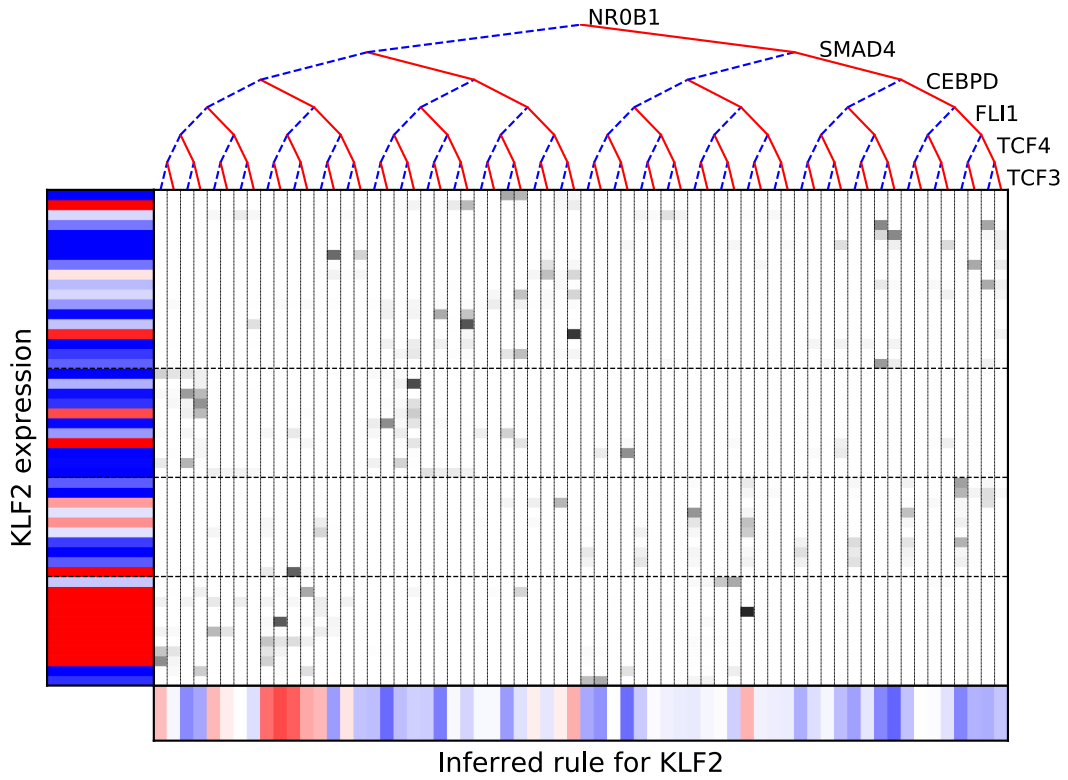

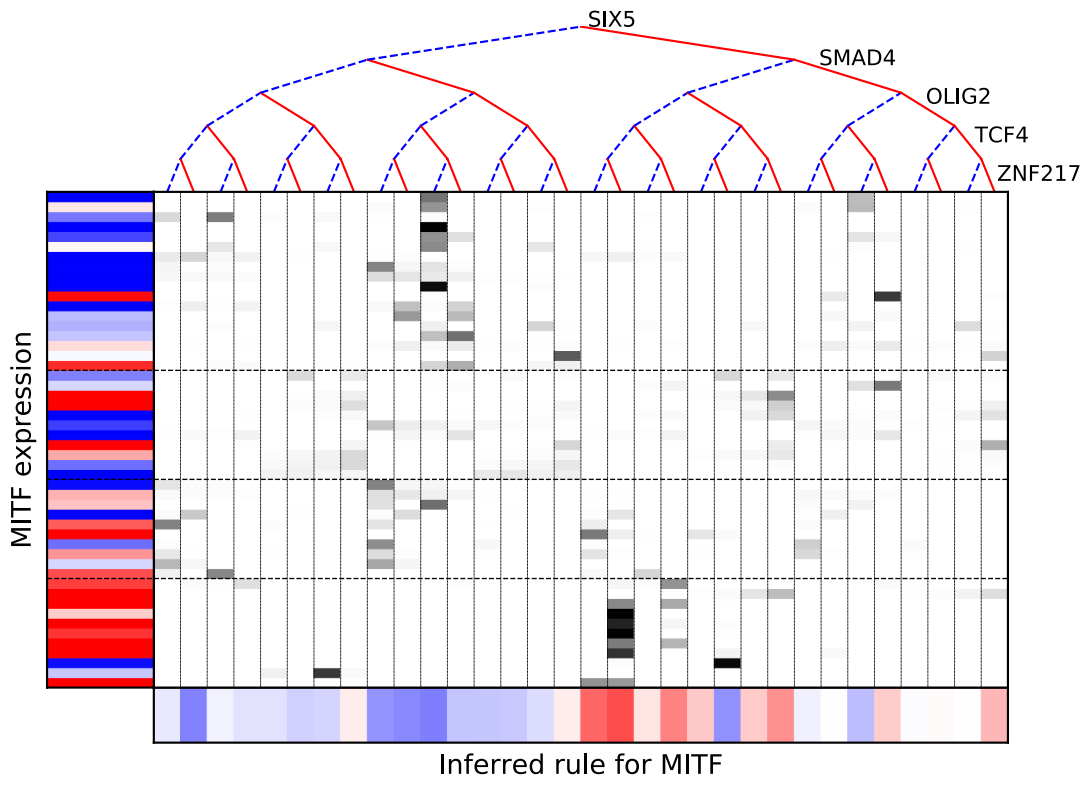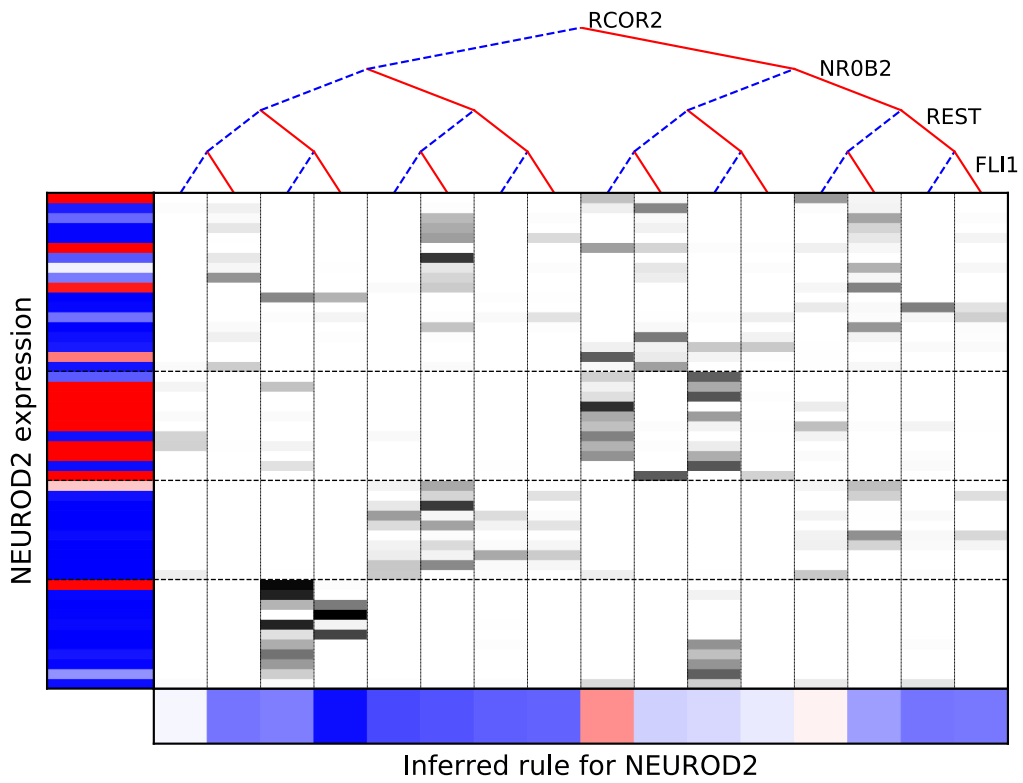

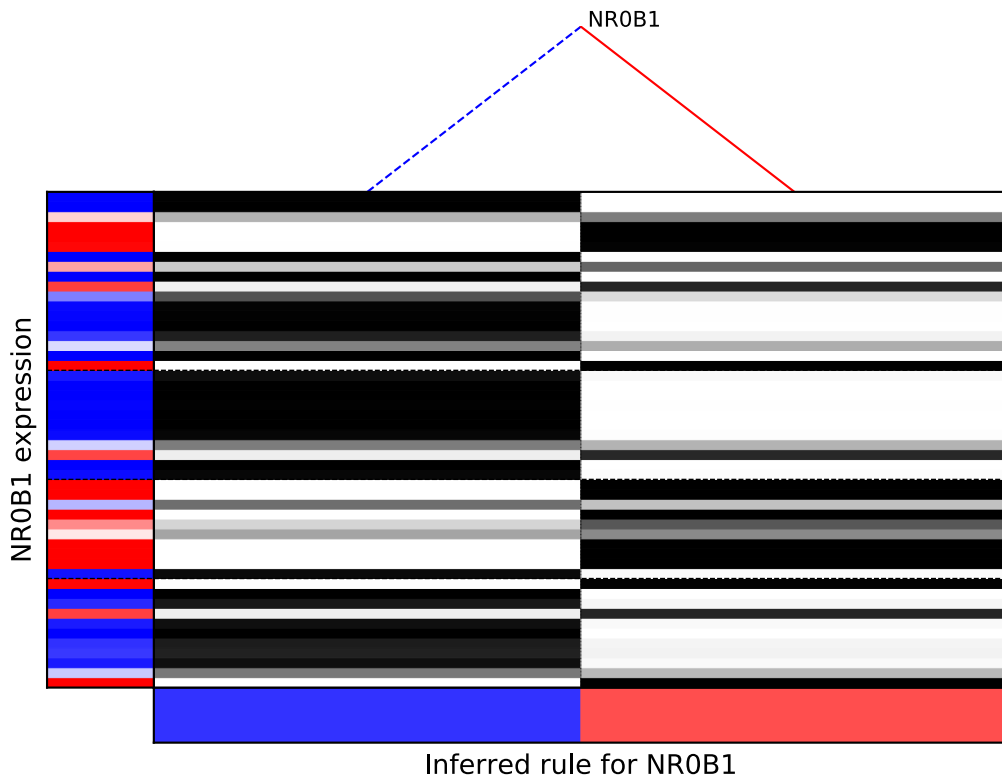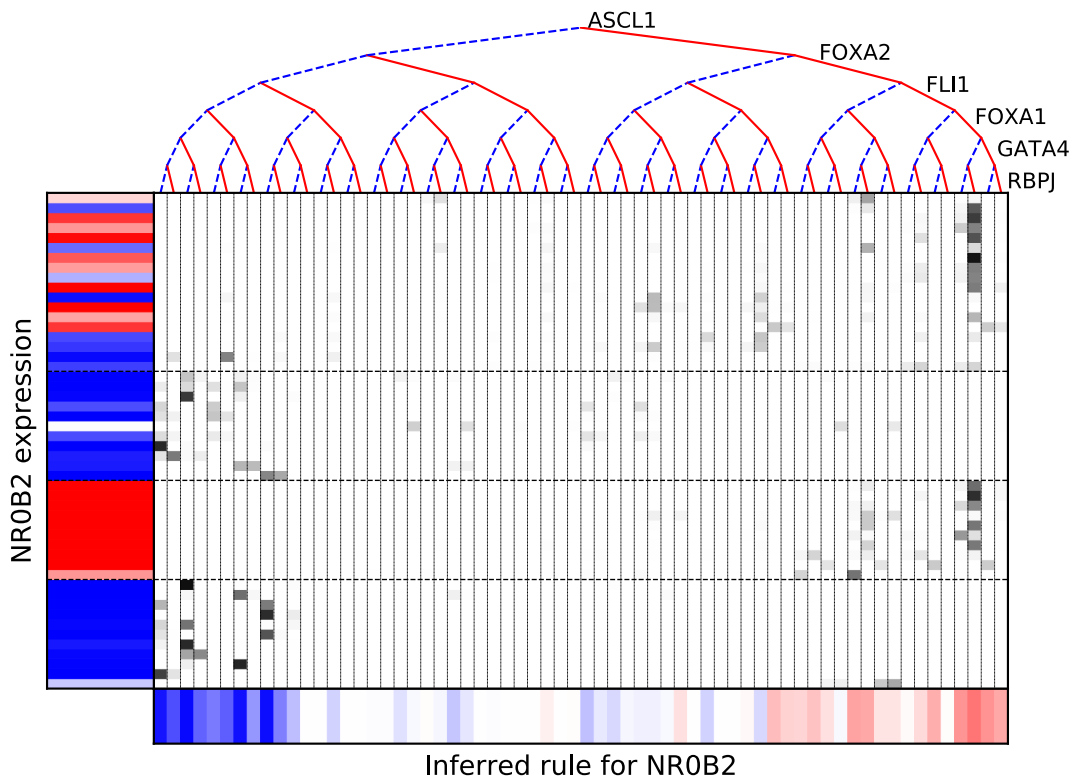

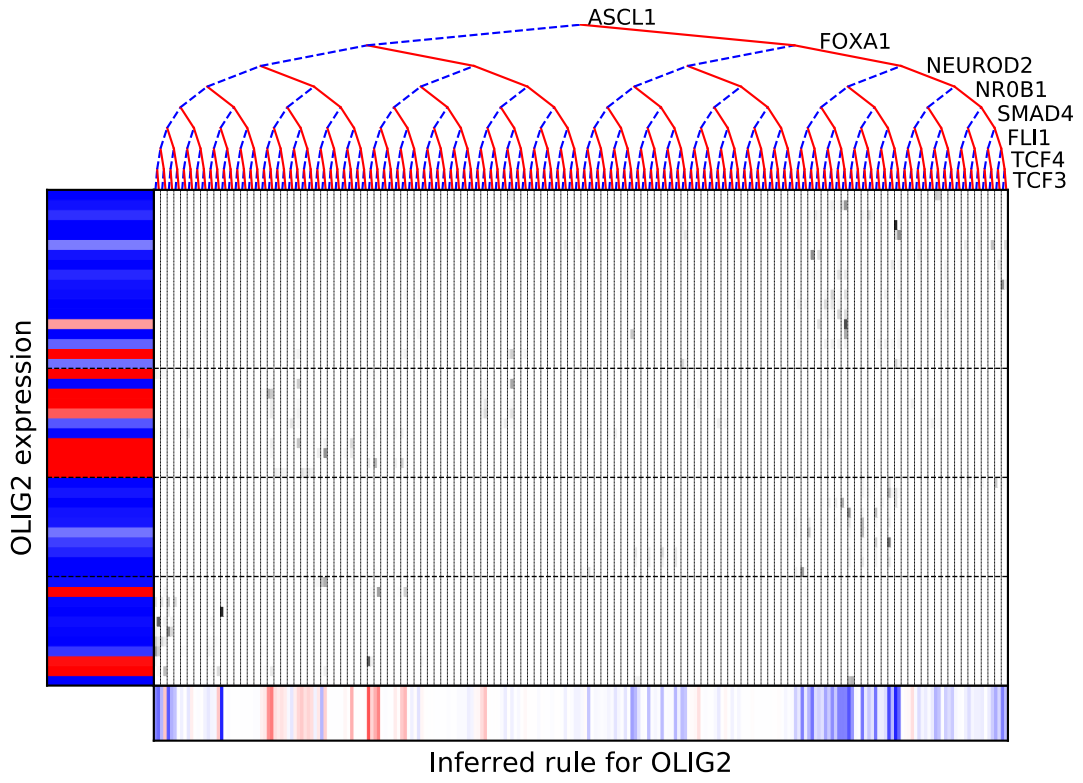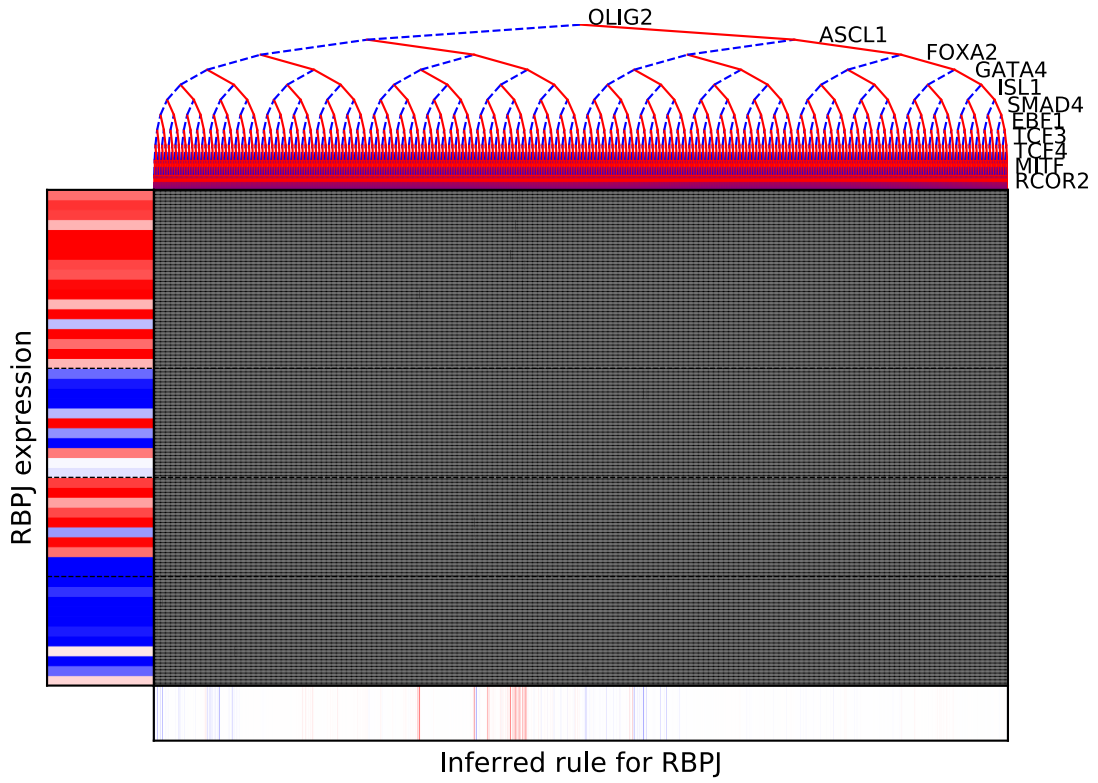



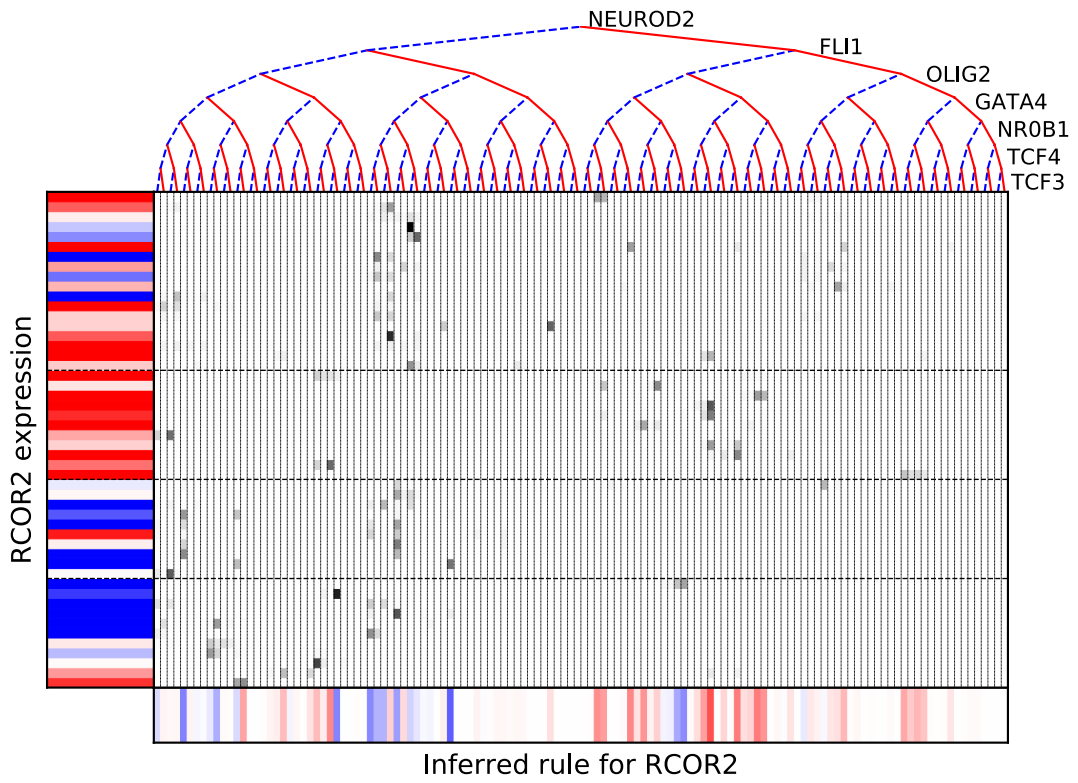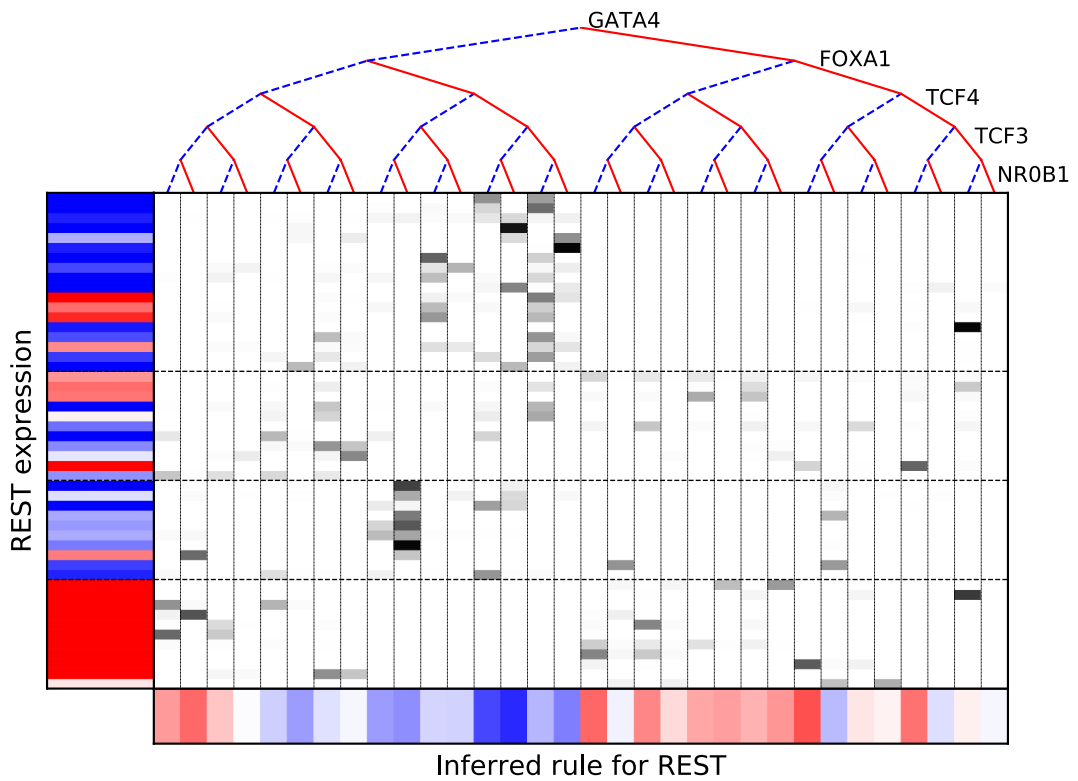

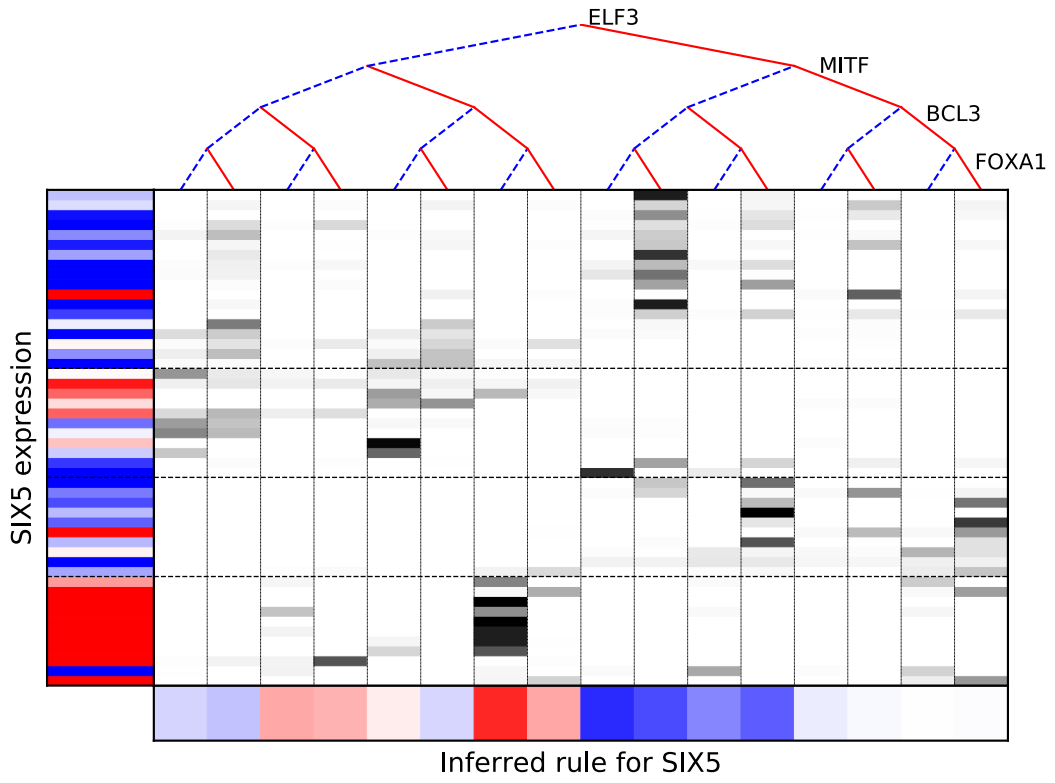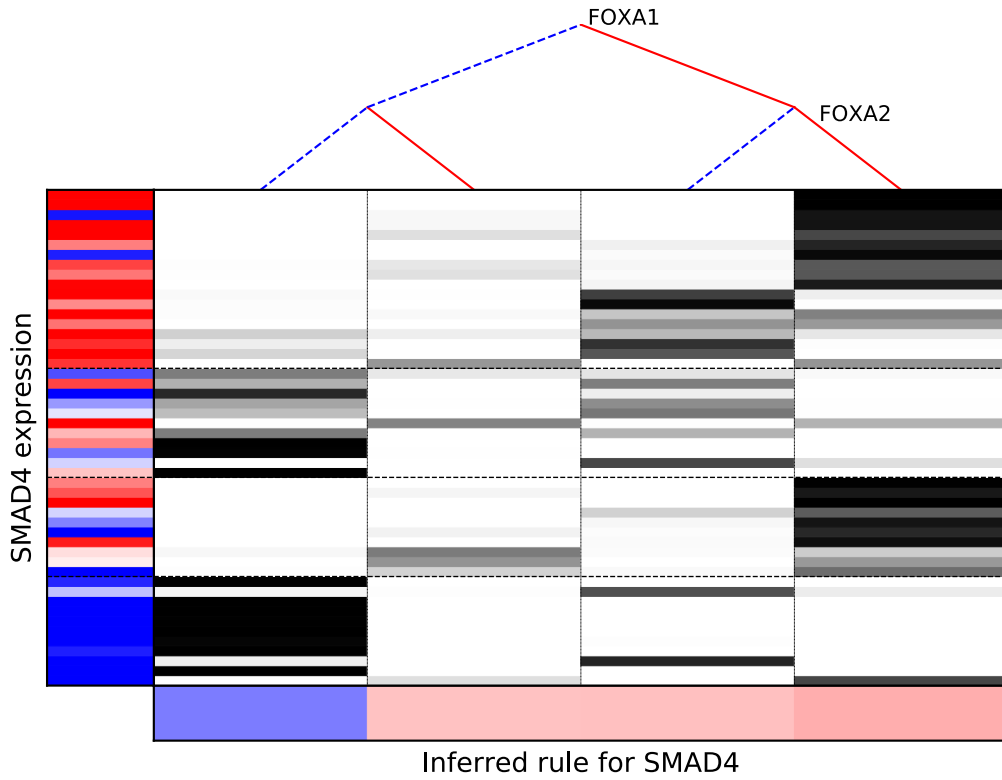

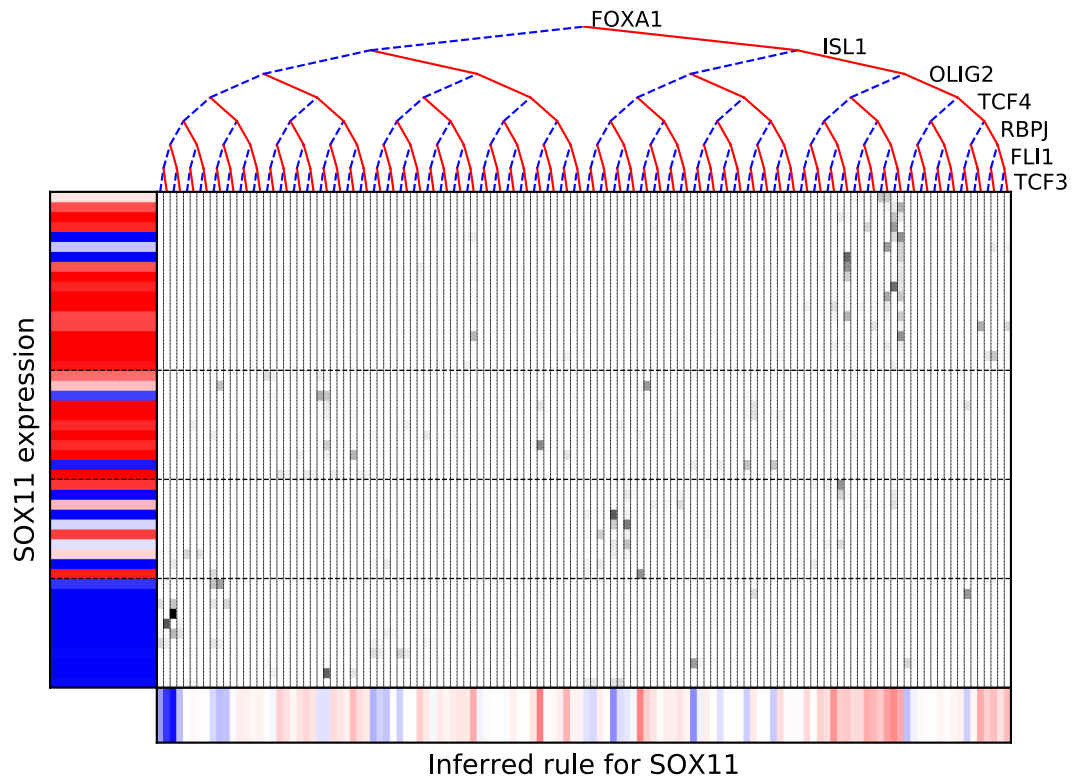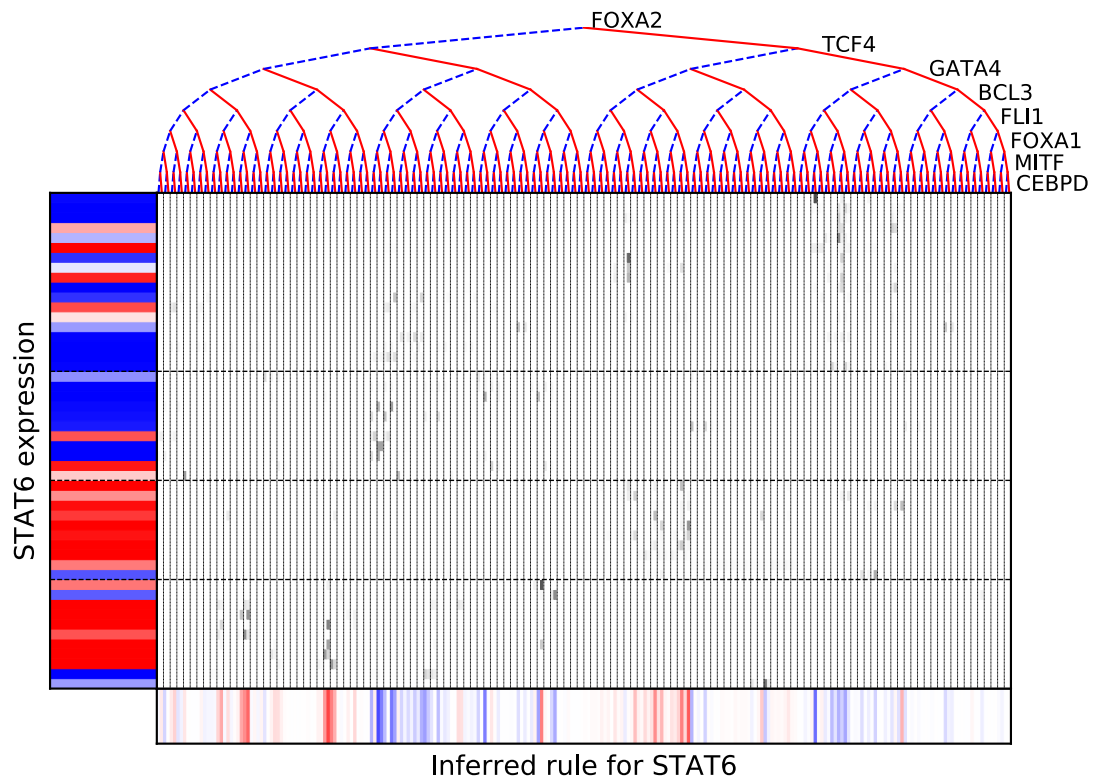

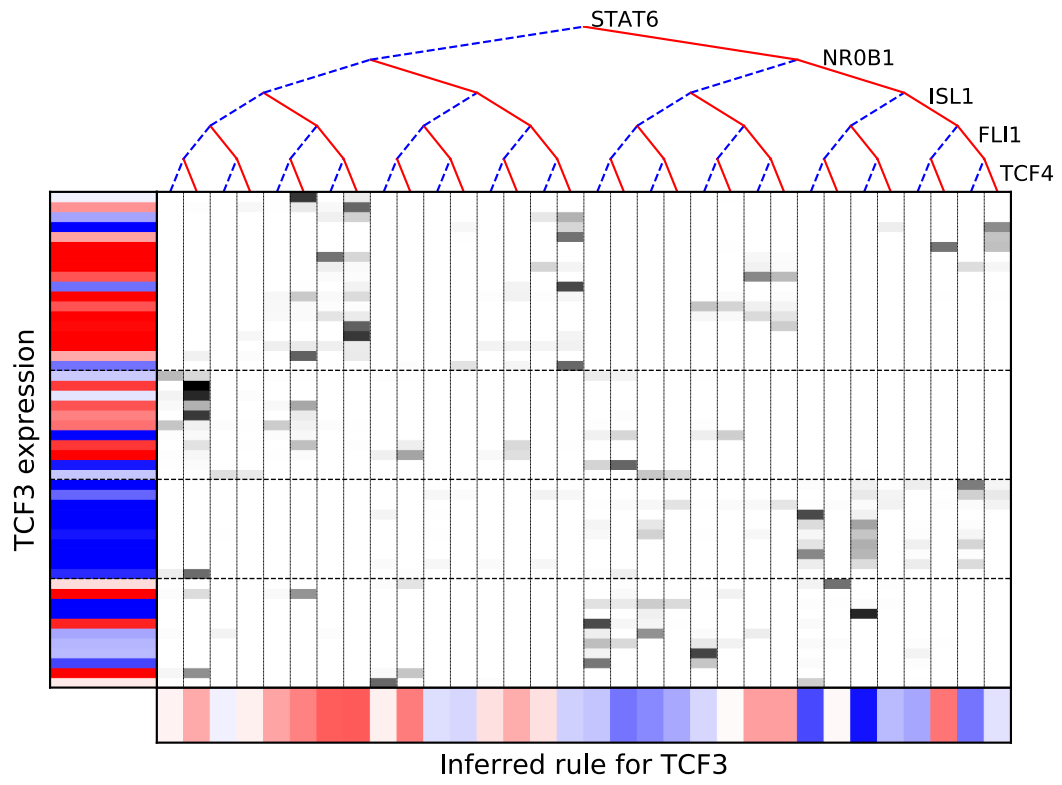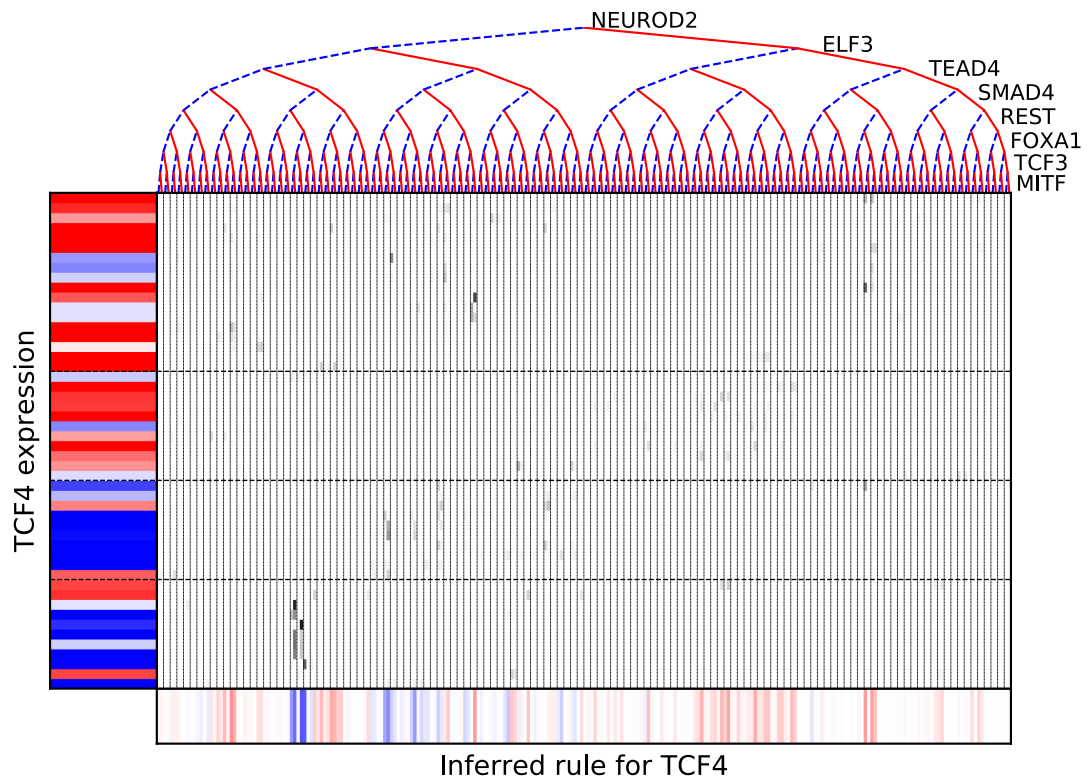

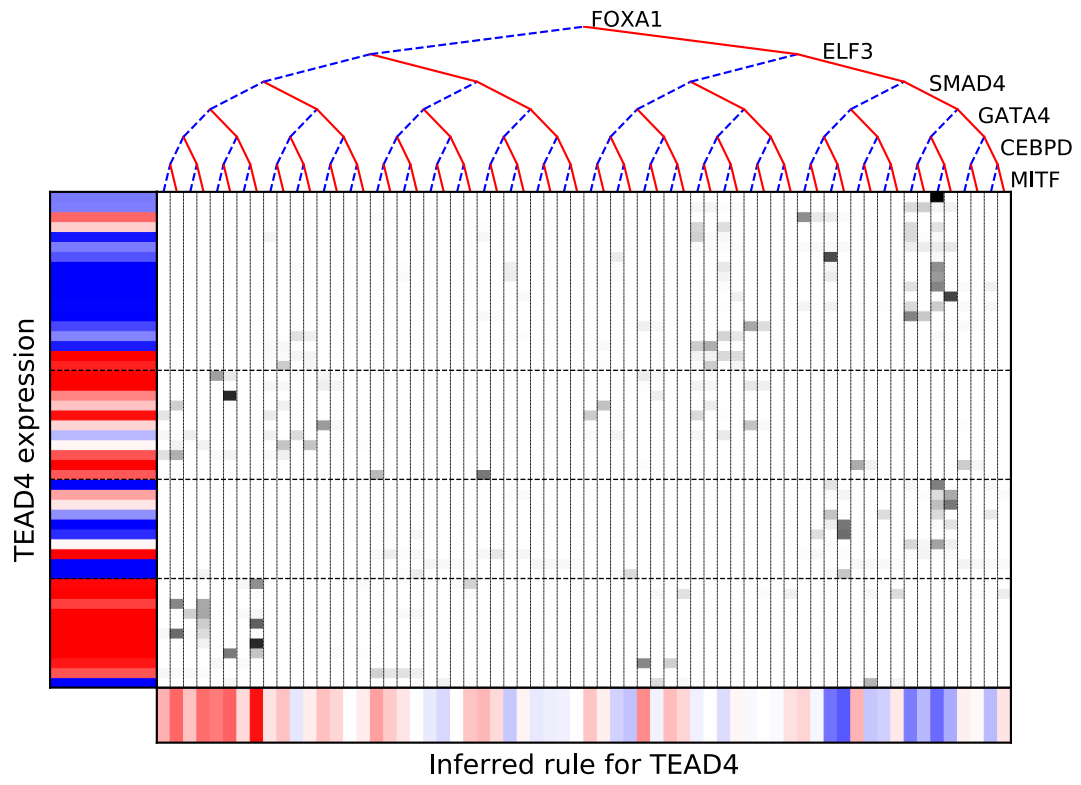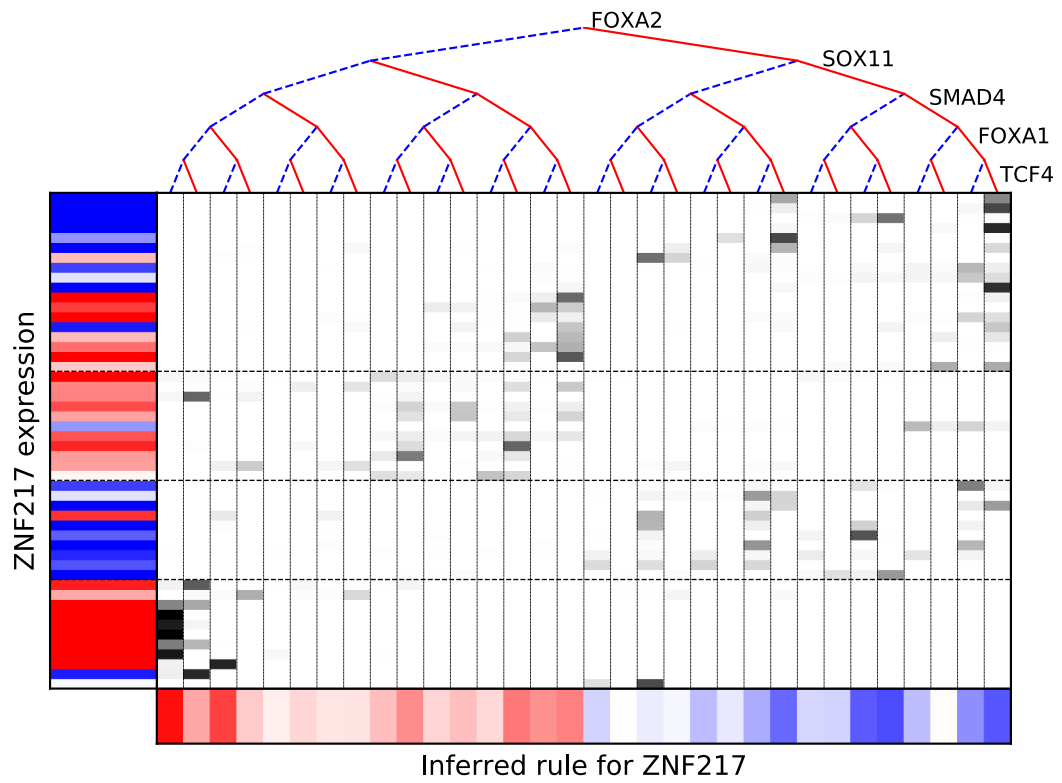

Supplement: pcbi.1007343.s007.pdf [file pcbi.1007343.s007.pdf]
